# Supplementary material
Source: MDPI journal article supplement (https://www.mdpi.com/2673-4540/3/1/9)
Supplement: s1 [file s1 › diabetology-1512927-supplementary.pdf]

**Supplementary Table S1. Comparison between participants included and excluded from this study.**

|                                                       | All<br>(N=996) | Included<br>(N=669) | Excluded (due<br>to missing<br>data of frailty<br>and metabolic<br>syndrome)<br>(N=327) | P-values |
|-------------------------------------------------------|----------------|---------------------|-----------------------------------------------------------------------------------------|----------|
| Age (years)                                           | 71.74 ± 8.61   | 71.11 ± 8.55        | 73.03 ± 8.61                                                                            | <0.001   |
| Female                                                | 598 (60.0%)    | 403 (60.2%)         | 195 (59.6%)                                                                             | 0.854    |
| Body mass index (kg/m <sup>2</sup> )                  | 21.80 ± 3.28   | 21.77 ± 3.43        | 21.86 ± 2.97                                                                            | 0.668    |
| Low education                                         | 239 (24.1%)    | 166 (24.8%)         | 73 (22.5%)                                                                              | 0.430    |
| Malnutrition (MNA ≤7)                                 | 68 (7.3%)      | 57 (8.7%)           | 11 (4.0%)                                                                               | 0.012    |
| Having history of hospitalization in<br>the past year | 472 (48.2%)    | 304 (45.9%)         | 168 (52.8%)                                                                             | 0.043    |
| Comorbidities:                                        |                |                     |                                                                                         |          |
| Charlson Comorbidity Index                            | 1.52 ± 1.24    | 1.51 ± 1.21         | 1.54 ± 1.30                                                                             | 0.781    |
| Hypertension                                          | 521 (52.3%)    | 318 (47.5%)         | 203 (62.1%)                                                                             | <0.001   |
| Diabetes                                              | 195 (19.6%)    | 133 (19.9%)         | 62 (19.0%)                                                                              | 0.731    |
| Myocardial infarction                                 | 26 (2.6%)      | 18 (2.7%)           | 8 (2.4%)                                                                                | 0.821    |
| Heart failure                                         | 24 (2.4%)      | 10 (1.5%)           | 14 (4.3%)                                                                               | 0.007    |
| Stroke                                                | 36 (3.6%)      | 25 (3.7%)           | 11 (3.4%)                                                                               | 0.767    |
| Peripheral vascular disease                           | 49 (4.9%)      | 30 (4.5%)           | 19 (5.8%)                                                                               | 0.364    |
| Chronic kidney disease                                | 480 (54.4%)    | 354 (53.5%)         | 126 (57.0%)                                                                             | 0.360    |
| Chronic obstructive pulmonary<br>disease              | 318 (31.9%)    | 251 (37.5%)         | 67 (20.5%)                                                                              | <0.001   |
| Cancer                                                | 15 (1.5%)      | 10 (1.5%)           | 5 (1.5%)                                                                                | 0.967    |
| Dementia                                              | 6 (0.6%)       | 4 (0.6%)            | 2 (0.6%)                                                                                | 0.979    |

Continuous data are presented as mean ± standard deviation. Categorical data are shown as n (%). MNA, Mini Nutritional Assessment.
